# Supplementary material
Source: Springer Nature journal article supplement (https://www.springermedizin.de/resource/supplementary/13231_2011_32_MOESM3_ESM.pdf/9676404)

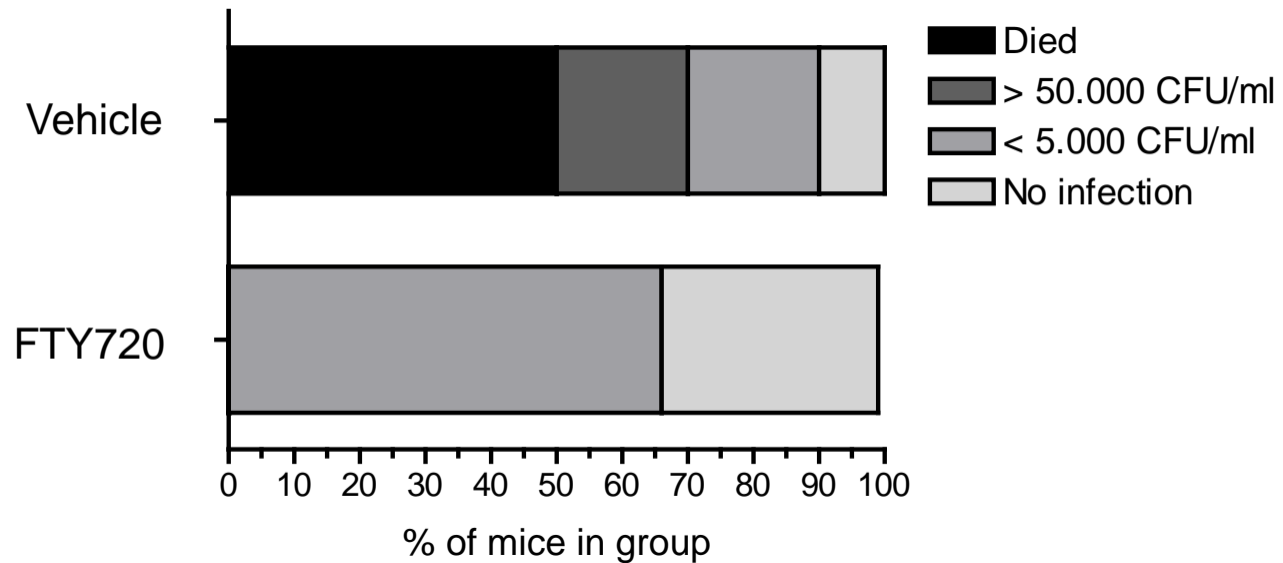

Supplement: MOESM3 [file 9676404]
